# Supplementary material
Source: publisher site journal article supplement (https://www.dovepress.com/article/467874)

| Female thyroid cancer | |  |  |  |  |  |  |  |  |  |  |  |
| --- | --- | --- | --- | --- | --- | --- | --- | --- | --- | --- | --- | --- |
|  |  |  |  |  |  |  |  |  |  |  |  |  |
| tumor type | Tx | T0 | T1 | T2 | T3 | T4 | Nx | N0 | N1 | Mx | M0 | M1 |
| papillary | 75 3.2 % | 15 0.6 % | 1347 57.9 % | 431 18.5 % | 389 16.7 % | 67 2.9 % | 652 29.1 % | 932 41.5 % | 660 29.4 % | 359 16.0 % | 1851 82.4 % | 36 1.6 % |
| follicular | 6 1.4 % | 2 0.5 % | 72 16.5 % | 176 40.3 % | 168 38.4 % | 13 3.0 % | 199 47.8 % | 196 47.1 % | 21 5.0 % | 47 11.0 % | 345 81.0 % | 34 8.0 % |
| papillary -follicular var. | 5 3.5 % | 0 0.0 % | 78 54.2 % | 40 27.8 % | 18 12.5 % | 3 2.1 % | 69 44.8 % | 63 40.9 % | 22 14.3 % | 23 16.1 % | 118 82.5 % | 2 1.4 % |
| medullary | 1 1.1 % | 0 0.0 % | 37 41.1 % | 33 36.7 % | 16 17.8 % | 3 3.3 % | 17 19.5 % | 33 37.9 % | 37 42.5 % | 13 15.1 % | 64 74.4 % | 9 10.5 % |
| oncocytoma | 0 0.0 % | 0 0.0 % | 12 18.8 % | 25 39.1 % | 22 34.4 % | 5 7.8 % | 28 45.2 % | 31 50.0 % | 3 4.8 % | 13 21.7 % | 45 75.0 % | 2 3.3 % |
| undifferentiated | 1 3.0 % | 0 0.0 % | 2 6.1 % | 4 12.1 % | 7 21.2 % | 19 57.6 % | 14 42.4 % | 9 27.3 % | 10 30.3 % | 7 21.2 % | 15 45.5 % | 11 33.3 % |
| anaplastic | 6 5.9 % | 0 0.0 % | 1 1.0 % | 4 3.9 % | 8 7.8 % | 83 81.4 % | 39 39.0 % | 23 23.0 % | 38 38.0 % | 16 16.0 % | 41 41.0 % | 43 43.0 % |
| other label | 2 1.4 % | 0 0.0 % | 64 46.4 % | 16 11.6 % | 36 26.0 % | 20 14.5 % | 43 39.4 % | 41 37.6 % | 25 22.9 % | 9 7.2 % | 104 83.2 % | 12 9.6 % |
| all thyroid cancer | 96 2.9 % | 17 0.5 % | 1613 48.4 % | 729 21.9 % | 664 19.9 % | 213 6.4 % | 1061 33.1 % | 1328 41.4 % | 816 25.5 % | 487 15.1 % | 2583 80.2 % | 149 4.6 % |
|  |  |  |  |  |  |  |  |  |  |  |  |  |
| Male thyroid cancer | |  |  |  |  |  |  |  |  |  |  |  |
|  |  |  |  |  |  |  |  |  |  |  |  |  |
| tumor type | Tx | T0 | T1 | T2 | T3 | T4 | Nx | N0 | N1 | Mx | M0 | M1 |
| papillary | 22 2.9 % | 5 0.7 % | 318 42.1 % | 173 22.9 % | 191 25.3 % | 47 6.2 % | 185 25.3 % | 236 32.3 % | 310 42.4 % | 122 16.8 % | 577 79.3 % | 28 3.9 % |
| follicular | 3 1.9 % | 0 0.0 % | 13 8.0 % | 55 34.0 % | 78 48.1 % | 13 8.0 % | 76 47.8 % | 71 44.7 % | 12 7.5 % | 17 10.9 % | 124 79.5 % | 15 9.6 % |
| papillary -follicular var. | 1 2.4 % | 1 2.4 % | 17 41.5 % | 9 22.0 % | 12 29.3 % | 1 2.4 % | 19 48.7 % | 10 25.6 % | 10 25.6 % | 7 18.4 % | 28 73.7 % | 3 7.9 % |
| medullary | 1 1.4 % | 0 0.0 % | 21 30.4 % | 14 20.3 % | 29 42.0 % | 4 5.8 % | 4 6.3 % | 17 27.0 % | 42 66.7 % | 10 15.4 % | 44 67.7 % | 11 16.9 % |
| oncocytoma | 0 0.0 % | 0 0.0 % | 2 8.7 % | 6 26.1 % | 13 56.5 % | 2 8.7 % | 11 50.0 % | 9 40.9 % | 2 9.1 % | 6 27.3 % | 15 68.2 % | 1 4.5 % |
| undifferentiated | 1 7.7 % | 0 0.0 % | 1 7.7 % | 0 0.0 % | 3 23.1 % | 8 61.5 % | 2 16.7 % | 1 8.3 % | 9 75.0 % | 3 21.4 % | 6 42.9 % | 5 35.7 % |
| anaplastic | 3 4.8 % | 0 0.0 % | 0 0.0 % | 2 3.2 % | 6 9.7 % | 51 82.3 % | 21 34.4 % | 15 24.6 % | 25 41.0 % | 6 9.4 % | 26 40.6 % | 32 50.0 % |
| other label | 2 3.2 % | 0 0.0 % | 14 22.6 % | 8 12.9 % | 23 37.1 % | 15 24.2 % | 15 30.6 % | 14 28.6 % | 20 40.8 % | 7 12.5 % | 41 73.2 % | 8 14.3 % |
| all thyroid cancer | 33 2.8 % | 6 0.5 % | 386 32.5 % | 267 22.5 % | 355 29.9 % | 141 11.9 % | 333 6.4 % | 373 32.8 % | 430 37.9 % | 178 15.6 % | 861 75.4 % | 103 9.0 % |

**Supplementary Table 1.** Distribution of stages in thyroid cancers diagnosed in years 2009 to 2018 in Sweden (patients >14 years old). Summary thyroid cancer statistics in the last rows.

**Supplementary Figure 1.** Relative survival (Pohar Perme estimates) for male and female all thyroid cancer and papillary and follicular types in Sweden in two periods, 1999-2008 and 20009-2018. Note y-axis range from 75 to 100%.


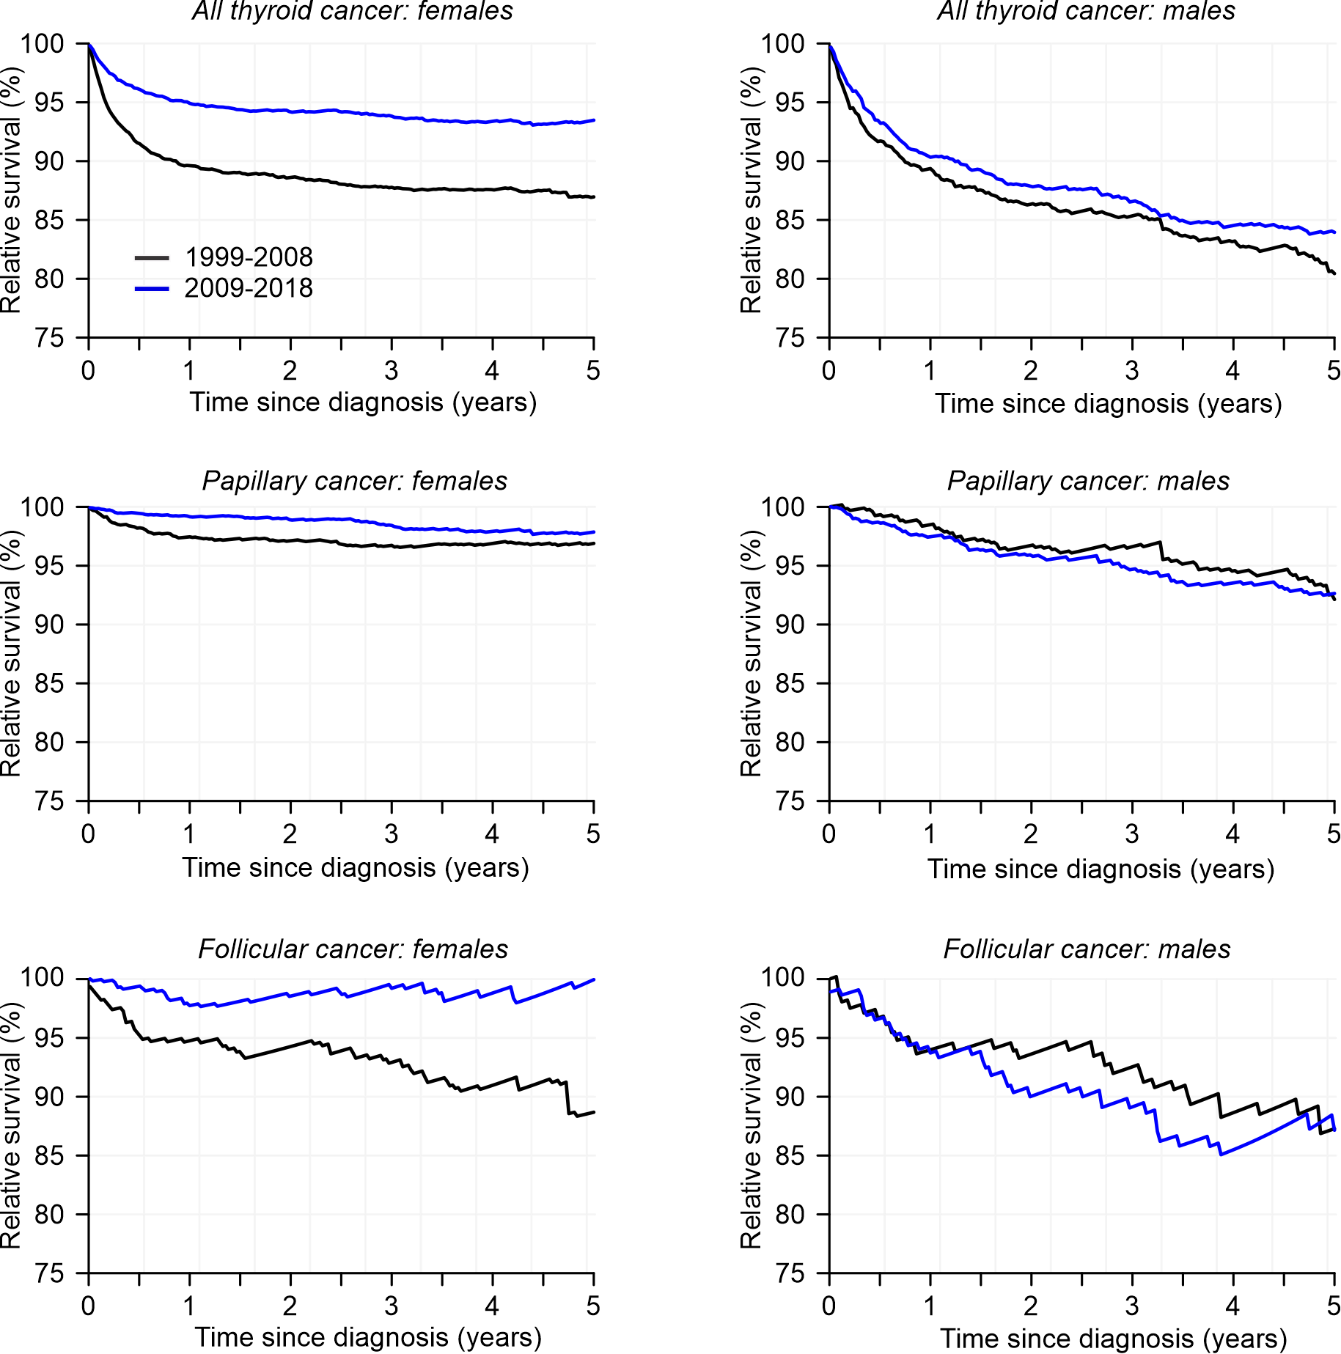

Supplement: Supplementary file 1 [file get_supplementary_file.php]
